# Examining frailty phenotypes of community-dwelling older adults in Taiwan using the falls risk for older people in the community – Taiwan version (Tw-FROP-Com)

Ya-Mei Tzeng<sup>1</sup>, Senyeong Kao<sup>1</sup>, Wun-Sin Chen<sup>2</sup>, Shueh-Fen Chen<sup>3</sup>, Shan-Ru Li<sup>1</sup>, Yu-Lung Chiu<sup>1</sup>, Yu-Tien Chang<sup>1</sup>, Yaw-Wen Chang<sup>4,5</sup>

<sup>1</sup>School of Public Health, National Defense Medical Center, Taipei City, Taiwan

<sup>2</sup>Institute and Department of Physiology and Biophysics, National Defense Medical Center, Taipei City, Taiwan

<sup>3</sup>Department of Senior Citizen Service Business, St. John's University Taipei Campus, New Taipei City, Taiwan

<sup>4</sup>Department of Family and Community Medicine, Tri-Service General Hospital, National Defense Medical Center, Taipei City, Taiwan

<sup>5</sup>School of Medicine, National Defense Medical Center, Taipei City, Taiwan

**Correspondence to:** Yu-Tien Chang, Yaw-Wen Chang; email: [greengarden720925@gmail.com](mailto:greengarden720925@gmail.com), <https://orcid.org/0000-0002-1801-7041>; [yawwenc@office365.ndmctsgh.edu.tw](mailto:yawwenc@office365.ndmctsgh.edu.tw)

**Keywords:** frailty, fall risk, fried frailty criteria, older adults, Tw-FROP-Com

**Abbreviations:** Tw-FROP-Com: Falls Risk for Older People in the Community – Taiwan Version

**Received:** June 15, 2023

**Accepted:** March 13, 2025

**Published:** April 1, 2025

**Copyright:** © 2025 Tzeng et al. This is an open access article distributed under the terms of the [Creative Commons Attribution License](https://creativecommons.org/licenses/by/4.0/) (CC BY 4.0), which permits unrestricted use, distribution, and reproduction in any medium, provided the original author and source are credited.

## ABSTRACT

**Background:** Falls are the second leading cause of accidental injury-related deaths among Taiwanese adults aged 65 and older. This study examined the association between Fried frailty phenotypes and fall risk in this population.

**Materials and Methods:** A cross-sectional study was conducted in Keelung City with 375 participants from an Elderly Fall Prevention Program. Frailty was assessed using the modified Fried criteria: weakness, slowness, exhaustion, low physical activity, and unintentional weight loss. Participants with 0–2 criteria were classified as non-frail, and those with 3 or more as frail. Fall risk was evaluated using the Taiwan version of the Falls Risk for Older People in the Community (Tw-FROP-Com), a 28-item tool scoring 0–60 across 13 risk factors.

**Results:** Participants had a mean age of  $75.4 \pm 6.8$  years; 76.0% were female, 18.7% were frail, and 32.7% had fallen in the past year. Those with a fall history had higher rates of weakness (56.7%), slowness (49.6%), and frailty (26.1%). Regression analysis showed that weakness ( $\beta = 0.64$ ), slowness ( $\beta = 0.21$ ), exhaustion ( $\beta = 1.28$ ), unintentional weight loss ( $\beta = 3.99$ ), and low physical activity ( $\beta = 0.88$ ) were significantly associated with increased fall risk. Frailty explained over 50% of fall risk variance, with unintentional weight loss as the strongest predictor.

**Conclusion:** Unintentional weight loss is the most significant predictor of fall risk among frailty traits. Individual frailty components better predict fall risk than composite frailty measures.

## INTRODUCTION

Falls are the second leading cause of death from unintentional injuries worldwide [1] and among adults aged 65 and older in Taiwan. Globally, over 80% of the

684,000 annual fall-related deaths occur in low- and middle-income countries. Adults aged 60 and older have the highest rates of fatal falls, with approximately 37.3 million falls each year severe enough to require medical attention. In Taiwan, one in six adults aged 65

and older has experienced a fall, and one in twelve has sought medical care due to fall-related injuries [2].

Falls among older adults often lead to functional decline due to disability, increasing their dependence on others and raising the risk of becoming a burden on caregivers or facing premature admission to nursing homes [3]. Additionally, falls can significantly impact physical and mental health, social functioning, and overall quality of life [4]. In response to these challenges, the World Health Organization (WHO) emphasizes the need for comprehensive fall prevention strategies, including research, education, training, safer environments, and policy development aimed at reducing fall risk [5].

Many factors contribute to falls suffered by older people, such as frailty [6], balance dysfunction, mobility problems, impaired vision, lack of vitamin D, fear of falling, depression, side effects of specific medications, and the presence of home hazards [7]. Frailty is a clinical condition resulting from age-related declines in physiological reserves. Consequently, frail older adults, including persons who have entered the prefrail stage, are likely to experience recurrent falls [7, 8]. Recently, frailty in the older population has attracted much attention because of studies showing its link to negative outcomes such as falls, institutionalization, hospitalization, incident disability, and death [9, 10]. Notably, the frailty phenotype has been associated with a greater risk of falls in women aged 55 and older [11]. A prospective cohort study of older men indicated that a simple frailty index—comprising weight loss, the inability to rise from a chair, and poor energy (Study of Osteoporotic Fractures index)—predicted the risk of falls, disability, fractures, and mortality as effectively as the more complex Cardiovascular Health Study (CHS) index. Components of the CHS include unintentional weight loss, poor grip strength, poor energy, slowness, and a low level of physical activity [12]. Another longitudinal cohort study used the CHS index and the Women's Health Initiative (WHI) phenotypes to predict fall risk in older women. Higher fall rates (Hazard Ratio (HR) = 1.48,  $p = 0.003$ ) were observed in the WHI frailty phenotype group compared with the CHS group [13]. The WHI phenotype, which does not require direct physical performance measurements, may be useful for the general older population [13]. In Japan, a cross-sectional study examined the prevalence and associated factors of cognitive frailty and cognitive frailty-related falls in community-dwelling older adults. Age, chronic disease, the Timed Up and Go Test, and the Council on Nutrition Appetite Questionnaire were significantly associated with cognitive frailty and cognitive frailty-related falls [14].

Numeric frailty assessment tools have been developed and have demonstrated their ability to predict the risk of

falling. However, there is no gold standard for assessing frailty [15]. Currently, a frailty index that does not require a physical examination is needed to predict fall risk and guide preventive interventions for the broader older population. Simple measurement tools can assess frailty as accurately as complex ones. Fried's frailty phenotypes meet these criteria and have been widely adopted in several studies [16–18].

According to Fried, frailty comprises five elements: weakness, slowness, exhaustion, low physical activity, and unintentional weight loss [19]. In most studies on frailty and fall risk, frailty has been treated as a categorical scale, such as non-frail/frail or non-frail/pre-frail/frail [20–23]. However, few studies have examined the correlation between individual frailty phenotypes and fall risk in Taiwan. Moreover, it remains unclear which frailty phenotype contributes most to the fall risk among community-dwelling older adults in Taiwan.

For fall risk assessment, we used the Falls Risk for Older People in the Community (FROP-Com), which has been widely applied in various older populations worldwide [24–27]. FROP-Com is simple to use and does not require physical measurements. As the first research team to translate and validate the FROP-Com into the Taiwan version (Tw-FROP-Com), our study effectively evaluated fall risk among Taiwanese older adults [28]. Therefore, this study aimed to explore the relationship between Fried's frailty phenotype and fall risk among community-dwelling older adults in Taiwan using the Tw-FROP-Com.

## RESULTS

Of the 425 subjects screened for a high risk of falling, only 375 participants who completed the frailty and fall risk assessments were included in the analysis. The sociodemographic characteristics of the participants and their fall risk are presented in Table 1. Participants had a mean age of  $75.4 \pm 6.8$  years, were predominantly women (76.0%), and the majority had a low level of education (23.7% were illiterate with no formal education, and 46.5% had only an elementary school education, totaling 70.2%). Additionally, most participants were from the Hokkien ethnic group (85.1%), lived with a spouse (55.7%), lived with others (83.9%), were cared for by others (59.6%), and had no history of falls (67.3%). Regarding frailty components, most participants did not exhibit weakness (52.4%), slowness (61.1%), exhaustion (74.3%), or low physical activity (20.0%).

We used the Tw-FROP-Com to evaluate fall risk. There was no significant difference in Tw-FROP-Com scores between males and females ( $p = 0.388$ ). Participants

**Table 1. Univariate analysis of basic demographic characteristics and fall risk among participants (n = 425).**

| Variables                                   | N (%)      | Tw-FROP-Com, The risk of falls, (Mean ± SD) | p-value   |
|---------------------------------------------|------------|---------------------------------------------|-----------|
| <b>Gender</b>                               |            |                                             |           |
| Male                                        | 102 (24.0) | 5.24 ± 4.07                                 | 0.388     |
| Female                                      | 323 (76.0) | 4.86 ± 3.74                                 |           |
| <b>Age</b>                                  |            |                                             |           |
| 65–74 years old                             | 211 (49.6) | 4.32 ± 3.58                                 | 0.001**   |
| ≥75 years old                               | 214 (50.4) | 5.57 ± 3.95                                 |           |
| <b>Educational level</b>                    |            |                                             |           |
| Illiterate                                  | 97 (23.7)  | 5.89 ± 4.27                                 | 0.022*    |
| Elementary school                           | 190 (46.5) | 4.61 ± 3.55                                 |           |
| Junior high school and higher               | 122 (29.8) | 4.76 ± 3.79                                 |           |
| <b>Race</b>                                 |            |                                             |           |
| Hokkien                                     | 354 (85.1) | 4.98 ± 3.85                                 | 0.898     |
| Non-Hokkien                                 | 62 (14.9)  | 5.05 ± 3.85                                 |           |
| <b>Marital status<sup>a</sup></b>           |            |                                             |           |
| With a spouse                               | 233 (55.7) | 4.48 ± 3.53                                 | 0.007**   |
| Without a spouse                            | 185 (44.3) | 5.49 ± 4.05                                 |           |
| <b>Live with others or not</b>              |            |                                             |           |
| Live with others                            | 355 (83.9) | 4.86 ± 3.87                                 | 0.277     |
| Live alone                                  | 68 (16.1)  | 5.41 ± 3.51                                 |           |
| <b>Caregivers</b>                           |            |                                             |           |
| Cared by others                             | 251 (59.6) | 4.96 ± 3.83                                 | 0.915     |
| Cared by themselves                         | 170 (40.4) | 4.92 ± 3.83                                 |           |
| <b>History of fall</b>                      |            |                                             |           |
| Falling in the past year                    | 139 (32.7) | 7.85 ± 3.68                                 | <0.001**  |
| No                                          | 286 (67.3) | 3.54 ± 3.01                                 |           |
| <b>Frailty component</b>                    |            |                                             |           |
| <b>Weakness n = (411)</b>                   |            |                                             |           |
| Yes                                         | 197 (47.6) | 6.08 ± 4.21                                 | <0.001*** |
| No                                          | 217 (52.4) | 3.83 ± 3.02                                 |           |
| <b>Slowness (n = 409)</b>                   |            |                                             |           |
| Yes                                         | 159 (38.9) | 6.92 ± 4.10                                 | <0.001*** |
| No                                          | 250 (61.1) | 3.50 ± 2.62                                 |           |
| <b>Exhaustion (n = 408)</b>                 |            |                                             |           |
| Yes                                         | 105 (25.7) | 6.50 ± 4.07                                 | <0.001*** |
| No                                          | 303 (74.3) | 4.40 ± 3.54                                 |           |
| <b>Weight loss (n = 395)</b>                |            |                                             |           |
| Yes                                         | 18 (4.6)   | 10.28 ± 4.51                                | <0.001*** |
| No                                          | 377 (95.4) | 4.77 ± 3.64                                 |           |
| <b>Low activity (n = 420)</b>               |            |                                             |           |
| Yes                                         | 84 (20.0)  | 6.40 ± 4.62                                 | 0.001**   |
| No                                          | 336 (80.0) | 4.57 ± 3.49                                 |           |
| <b>Frailty status<sup>b</sup> (n = 375)</b> |            |                                             |           |
| Yes                                         | 70 (18.7)  | 8.70 ± 4.13                                 | <0.001*** |
| No                                          | 305 (81.3) | 4.07 ± 3.00                                 |           |

<sup>a</sup>“With a spouse” includes married status; “Without a spouse” includes single, divorced, and widowed. <sup>b</sup>Frailty status was assessed based on Fried’s phenotype criteria. Participants meeting ≥3 of 5 criteria were classified as frail; those with 0–2 were non-frail. One-way ANOVA was used for comparisons involving more than two groups; independent sample *t*-tests were used for comparisons between two groups. \**p* < 0.05, \*\**p* < 0.01, \*\*\**p* < 0.001.

over 75 years old had a significantly higher fall risk compared to those aged 65–74 years (*p* = 0.001). Illiterate individuals had significantly higher Tw-FROP-Com scores than the other two groups (*p* = 0.022).

Married participants had lower Tw-FROP-Com scores than unmarried participants (*p* = 0.007). Participants with a history of falling in the past year had significantly higher Tw-FROP-Com scores than those

**Table 2. Univariate analysis of basic demographic characteristics among participants with and without falls (*n* = 425).**

| Variables                                          | <i>N</i> (%) | Non-faller, <i>n</i> (%) | Faller, <i>n</i> (%) | <i>p</i> -value |
|----------------------------------------------------|--------------|--------------------------|----------------------|-----------------|
| <b>Gender</b>                                      |              |                          |                      |                 |
| Male                                               | 102 (24.0)   | 72 (25.2)                | 30 (21.6)            | 0.489           |
| Female                                             | 323 (76.0)   | 214 (74.8)               | 109 (78.4)           |                 |
| <b>Age</b>                                         |              |                          |                      |                 |
| 65–74 years old                                    | 211 (49.6)   | 142 (49.7)               | 69 (49.6)            | 1.000           |
| ≥75 years old                                      | 214 (50.4)   | 144 (50.3)               | 70 (50.4)            |                 |
| <b>Educational level</b>                           |              |                          |                      |                 |
| Illiterate                                         | 97 (23.7)    | 68 (24.5)                | 29 (22.0)            | 0.807           |
| Elementary school                                  | 190 (46.5)   | 126 (45.5)               | 64 (48.5)            |                 |
| Junior high school and higher                      | 122 (29.8)   | 83 (30.0)                | 39 (29.5)            |                 |
| <b>Race</b>                                        |              |                          |                      |                 |
| Hokkien                                            | 354 (85.1)   | 233 (83.8)               | 21 (87.7)            | 0.370           |
| Non-Hokkien                                        | 62 (14.9)    | 45 (16.2)                | 17 (12.3)            |                 |
| <b>Marital status<sup>a</sup></b>                  |              |                          |                      |                 |
| With a spouse                                      | 233 (55.7)   | 160 (56.7)               | 73 (53.7)            | 0.628           |
| Without a spouse                                   | 185 (44.3)   | 122 (43.3)               | 63 (46.3)            |                 |
| <b>Live with others or not</b>                     |              |                          |                      |                 |
| Live with others                                   | 355 (83.9)   | 239 (83.9)               | 113 (84.1)           | 1.000           |
| Live alone                                         | 68 (16.1)    | 46 (16.1)                | 22 (15.9)            |                 |
| <b>Caregivers</b>                                  |              |                          |                      |                 |
| Cared by others                                    | 251 (59.6)   | 171 (60.4)               | 80 (58.0)            | 0.707           |
| Cared by themselves                                | 170 (40.4)   | 112 (39.6)               | 58 (42.0)            |                 |
| <b>Frailty component</b>                           |              |                          |                      |                 |
| <b>Weakness <i>n</i> = (411)</b>                   |              |                          |                      |                 |
| Yes                                                | 197 (47.6)   | 121 (43.2)               | 86 (56.7)            | 0.014*          |
| No                                                 | 217 (52.4)   | 159 (56.8)               | 58 (43.3)            |                 |
| <b>Slowness (<i>n</i> = 409)</b>                   |              |                          |                      |                 |
| Yes                                                | 159 (38.9)   | 93 (33.7)                | 66 (49.6)            | 0.003**         |
| No                                                 | 250 (61.1)   | 183 (66.3)               | 67 (50.4)            |                 |
| <b>Exhaustion (<i>n</i> = 408)</b>                 |              |                          |                      |                 |
| Yes                                                | 105 (25.7)   | 73 (26.4)                | 32 (24.2)            | 0.722           |
| No                                                 | 303 (74.3)   | 203 (73.6)               | 100 (75.8)           |                 |
| <b>Weight loss (<i>n</i> = 395)</b>                |              |                          |                      |                 |
| Yes                                                | 18 (4.6)     | 257 (96.3)               | 120 (93.8)           | 0.390           |
| No                                                 | 377 (95.4)   | 10 (3.7)                 | 8 (6.3)              |                 |
| <b>Low activity (<i>n</i> = 420)</b>               |              |                          |                      |                 |
| Yes                                                | 84 (20.0)    | 54 (19.1)                | 30 (21.9)            | 0.585           |
| No                                                 | 336 (80.0)   | 229 (80.9)               | 54 (19.1)            |                 |
| <b>Frailty status<sup>b</sup> (<i>n</i> = 375)</b> |              |                          |                      |                 |
| Yes                                                | 70 (18.7)    | 39 (15.2)                | 31 (26.1)            | 0.018*          |
| No                                                 | 305 (81.3)   | 217 (84.8)               | 88 (73.9)            |                 |

<sup>a</sup>“With a spouse” includes married status; “Without a spouse” includes single, divorced, and widowed. <sup>b</sup>Frailty status was assessed based on Fried’s phenotype criteria. Participants meeting ≥3 of 5 criteria were classified as frail; those with 0–2 were non-frail. Chi-square tests were used for categorical comparisons; Yates’ continuity correction was applied to 2 × 2 tables when appropriate. \**p* < 0.05, \*\**p* < 0.01, \*\*\**p* < 0.001.

without a history of falling (*p* < 0.001). However, no significant difference was observed between participants living with others and those being cared for by others.

Among the frailty phenotypes, all five components—weakness, slowness, exhaustion, weight loss, and low

physical activity—were significantly and positively associated with Tw-FROP-Com scores. We found that 18.7% of the 375 participants were classified as frail. Additionally, the comparison of characteristics between participants with and without a history of falls is presented in Table 2. Participants with a history of falls

**Table 3. Multivariable linear regression analysis of fall risk scores based on frailty components (*n* = 375).**

| Independent variables                | $\beta$ | Std. Error | 95% CI      | <i>p</i> -value       |
|--------------------------------------|---------|------------|-------------|-----------------------|
| History of fall <sup>#</sup>         | 3.762   | 0.290      | 3.191–4.333 | <0.001 <sup>***</sup> |
| <b>Frailty component<sup>#</sup></b> |         |            |             |                       |
| Weakness                             | 0.644   | 0.286      | 0.082–1.206 | 0.025 <sup>*</sup>    |
| Slowness                             | 0.213   | 0.031      | 0.151–0.274 | <0.001 <sup>***</sup> |
| Exhaustion                           | 1.280   | 0.312      | 0.666–1.895 | <0.001 <sup>***</sup> |
| Weight loss                          | 3.992   | 0.616      | 2.781–5.203 | <0.001 <sup>***</sup> |
| Low activities                       | 0.878   | 0.348      | 0.194–1.563 | 0.009 <sup>**</sup>   |
| <b>Model R<sup>2</sup></b>           |         | 0.552      |             |                       |

This model was adjusted for covariates including age, education, and marital status.  $\beta$  represents the coefficient of each variable. The multivariable linear regression formula was: Fall Risk = Fall History + Frailty Components + Age + Education + Marital Status. <sup>#</sup>History of fall and frailty components are binary categorical variables (Yes/No), with “No” as the reference group. <sup>\*</sup>*p* < 0.05, <sup>\*\*</sup>*p* < 0.01, <sup>\*\*\*</sup>*p* < 0.001.

were significantly more likely to exhibit weakness (*p* = 0.014), slowness (*p* = 0.003), and a tendency toward frailty (*p* = 0.018).

Using multivariable linear regression, we evaluated the association between fall risk scores (Tw-FROP-Com scores) and a history of falling, along with all components of frailty, after adjusting for age, education, and marital status. The results are presented in Table 3. Older adults who exhibited weakness ( $\beta$  = 0.644, 95% CI: 0.082–1.206), slowness ( $\beta$  = 0.213, 95% CI: 0.151–0.274), exhaustion ( $\beta$  = 1.280, 95% CI: 0.666–1.895),

unintentional weight loss ( $\beta$  = 3.992, 95% CI: 2.781–5.203), and low physical activity ( $\beta$  = 0.878, 95% CI: 0.194–1.563) had significantly higher Tw-FROP-Com scores. Based on the B values, unintentional weight loss was the most influential factor for fall risk scores, followed by exhaustion, low physical activity, weakness, and slowness. The distribution of fall risk scores predicted by individual frailty components is illustrated in Figure 1.

Frailty was treated as a dichotomous variable (Yes/No) in Table 4, whereas the model in Table 3 included five

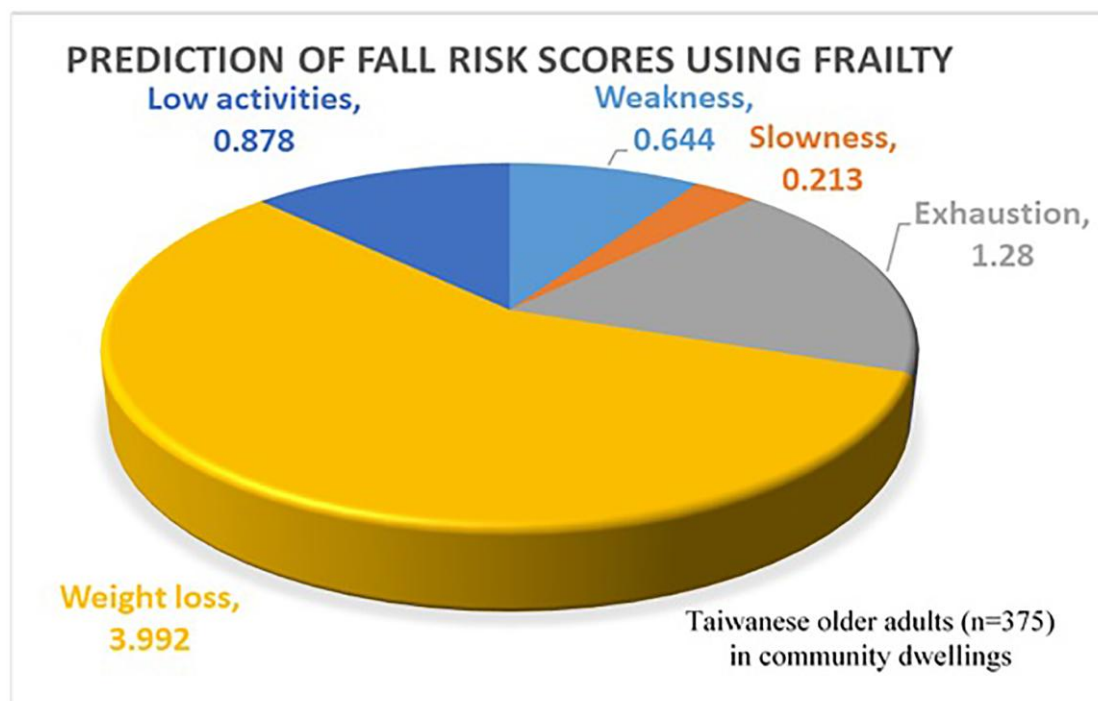

**Figure 1.** Distribution of fall risk scores predicted by individual frailty components among Taiwanese older adults (*n* = 375) living in community dwellings.



**Table 4. Multivariable linear regression analysis of the association of fall risk and frailty as well as fall history (*n* = 375).**

| Independent variables        | $\beta$ | Std. Error | 95% CI      | <i>p</i> -value |
|------------------------------|---------|------------|-------------|-----------------|
| History of fall <sup>#</sup> | 3.886   | 0.370      | 3.281–4.491 | <0.001***       |
| Frailty status <sup>#</sup>  | 3.886   | 0.307      | 3.158–4.615 | <0.001***       |
| <b>Model R<sup>2</sup></b>   | 0.484   |            |             |                 |

This model was adjusted for age, education, and marital status. The multivariable linear regression formula was: Fall Risk = Fall History + Frailty Status + Age + Education + Marital Status. Frailty status was a binary categorical variable (“frail” vs. “non-frail”). <sup>#</sup>History of fall and frailty status are binary categorical variables (Yes/No), with “No” as the reference group. \**p* < 0.05, \*\**p* < 0.01, \*\*\**p* < 0.001.

**Table 5. Multivariate logistic regression analysis of the association between fall history, frailty components and falls risk grading (*n* = 375).**

| Independent variables                | Model 1  |              |                 | Model 2     |               |                 |
|--------------------------------------|----------|--------------|-----------------|-------------|---------------|-----------------|
|                                      | Crude OR | 95% CI       | <i>p</i> -value | Adjusted OR | 95% CI        | <i>p</i> -value |
| History of fall <sup>#</sup>         | 6.339    | 2.569–15.642 | <0.001***       | 9.285       | 2.672–32.262  | <0.001***       |
| <b>Frailty component<sup>#</sup></b> |          |              |                 |             |               |                 |
| Weakness                             | 2.883    | 1.175–7.077  | 0.021*          | 0.551       | 0.163–1.860   | 0.337           |
| Slowness                             | 12.877   | 3.780–43.869 | <0.001***       | 4.939       | 1.222–19.971  | 0.025*          |
| Exhaustion                           | 2.834    | 1.246–6.443  | 0.013*          | 3.368       | 1.063–10.673  | 0.039*          |
| Weight loss                          | 16.000   | 5.601–45.703 | <0.001***       | 23.843      | 5.172–109.904 | <0.001***       |
| Low activities                       | 3.307    | 1.304–7.073  | 0.010*          | 3.935       | 1.263–12.261  | 0.018           |
| Nagelkerke R <sup>2</sup> = 0.459    |          |              |                 |             |               |                 |

Falls risk grading was divided into two categories: mild and moderate risk, with the mild risk group serving as the reference category. In Model 1, crude odds ratios (ORs) were calculated for each frailty component individually. Model 2 was adjusted for age, education, marital status, and history of falling. <sup>#</sup>History of fall and frailty components are binary categorical variables (Yes/No), with “No” as the reference group. \**p* < 0.05, \*\**p* < 0.01, \*\*\**p* < 0.001.

individual components. The results of the multivariable linear regression analysis for fall risk are presented in Table 4. Older adults with a history of falling had significantly higher fall risk scores than those without a history of falling ( $\beta$  = 3.886, 95% CI: 3.281–4.491). Additionally, frail older adults had higher fall risk scores compared to non-frail older adults ( $\beta$  = 3.886, 95% CI: 3.158–4.615).

The only difference between the models in Tables 3 and 4 was how frailty was measured. The model in Table 3 assessed frailty as five separate components, whereas the model in Table 4 treated it as a dichotomous Yes/No variable. Based on the R<sup>2</sup> values of the multivariable linear regression models, the R<sup>2</sup> values for Tables 3 and 4 were 0.552 and 0.484, respectively. This finding suggests that evaluating individual frailty components predicts fall risk more effectively than using a dichotomous frailty measure, with a 6.8% increase in predictive accuracy.

Furthermore, we conducted a logistic regression analysis by categorizing the Tw-FROP-Com scores into

two groups: the mild fall risk group (0–11) and the moderate fall risk group (12–60). We performed both crude odds ratio analyses and analyses adjusted for age, education, and marital status. Table 5 presents the association between fall history and each individual frailty component, evaluating their relationship with the fall risk groups. Older adults who exhibited weakness (aOR = 9.285, 95% CI: 2.672–32.262), slowness (aOR = 0.551, 95% CI: 0.163–1.860), exhaustion (aOR = 3.368, 95% CI: 1.063–10.673), unintentional weight loss (aOR = 23.843, 95% CI: 5.172–109.904), and low physical activity (aOR = 3.935, 95% CI: 1.263–12.261) had a higher likelihood of being in the moderate fall risk group.

The results of the multivariable logistic regression model for fall risk grading are shown in Table 6. Older adults with a history of falling had a significantly higher fall risk than those without a history of falling (aOR = 13.097, 95% CI: 4.117–41.667). Additionally, frail older adults had a significantly higher fall risk compared to non-frail older adults (aOR = 15.510, 95% CI: 4.526–53.153). According to the Nagelkerke R<sup>2</sup>, the

**Table 6. Multivariate logistic regression analysis of the association between fall history, frailty and falls risk grading (*n* = 375).**

| Independent variables             | Model 1  |              |                 | Model 2     |              |                 |
|-----------------------------------|----------|--------------|-----------------|-------------|--------------|-----------------|
|                                   | Crude OR | 95% CI       | <i>p</i> -value | Adjusted OR | 95% CI       | <i>p</i> -value |
| History of fall <sup>#</sup>      | 6.339    | 2.569–15.642 | <0.001***       | 13.097      | 4.117–41.667 | <0.001***       |
| Frailty status <sup>#</sup>       | 6.729    | 2.719–16.653 | <0.001***       | 15.51       | 4.526–53.153 | <0.001***       |
| Nagelkerke R <sup>2</sup> = 0.335 |          |              |                 |             |              |                 |

Falls risk grading was divided into two categories: mild and moderate risk, with the mild risk group serving as the reference category. In Model 1, crude odds ratios (ORs) were calculated for each variable individually. Model 2 was adjusted for age, education, and marital status. Frailty status was a binary categorical variable (“frail” vs. “non-frail”). <sup>#</sup>History of fall and frailty status are binary categorical variables (Yes/No), with “No” as the reference group. \**p* < 0.05, \*\**p* < 0.01, \*\*\**p* < 0.001.

values for Tables 5 and 6 were 0.459 and 0.335, respectively. This finding suggests that frailty components predict fall risk grading more effectively than the dichotomous frailty measure (Yes/No), with a 12.4% improvement in predictive accuracy.

## DISCUSSION

To the best of our knowledge, this study is the first to evaluate the association between frailty components and fall risk scores, as measured by the Tw-FROP-Com assessment tool, among community-dwelling older adults in Taiwan. Our findings indicate that frailty components account for more than 50% of the variation in fall risk scores among individuals with a history of falls. Older adults experiencing unintentional weight loss, weakness, exhaustion, slowness, and low physical activity had significantly higher Tw-FROP-Com scores after adjusting for sociodemographic factors and fall history. As expected, frail older adults exhibited significantly higher fall risk scores than non-frail individuals. Among the five frailty components, unintentional weight loss emerged as the most influential factor affecting fall risk. Treating frailty as five distinct components provided a more precise prediction of fall risk than using a dichotomous frailty measure (Yes/No). Unintentional weight loss was identified as a critical intrinsic factor, highlighting the need for a differentiated approach to the frailty phenotype among the oldest old, taking into account the specific influence of its components [15]. Each individual indicator can be used to screen older adults at high risk of falls, enabling early detection and timely intervention. Based on the specific scores of each frailty component, tailored fall prevention strategies can be implemented, such as weight management, dietary recommendations, and exercises to improve muscular strength and endurance. These targeted interventions aim to effectively reduce the risk of falls among the elderly population.

Since unintentional weight loss emerged as a key factor in frailty associated with fall risk among older adults,

effective weight management and regular monitoring are critical components of fall prevention strategies. Despite the various criteria used to define frailty, weight loss has consistently been a significant predictor of future falls among both community-dwelling [29] and hospitalized older adults [30]. However, previous studies primarily used Fried frailty status (Yes/No) as an outcome variable rather than examining frailty through its five distinct phenotypes. Moreover, no existing studies have assessed fall risk among community-dwelling older adults using both the Fried frailty index and the Tw-FROP-Com. In contrast, our study distinguished the five frailty phenotypes and assessed the overall fall risk. Additionally, the Tw-FROP-Com proved to be a practical and efficient tool, requiring no supplementary instruments to comprehensively assess the 13 fall risk domains. Its simplicity makes it highly applicable in both clinical and community settings for the early identification of older adults at risk of falling. Numerous studies have demonstrated a connection between frailty status and a history of falls [14, 21, 31]. Our findings offer novel insights compared to previous studies. For example, a study conducted in Brazil interviewed 1,413 older adults to assess the association between frailty and falls. The frailty components associated with fall risk included: (1) reduced grip strength (no falls: 21.8%; falls: 31.5%; relative risk (RR) = 1.44; *p* = 0.003) and (2) exhaustion (no falls: 7.6%; falls: 14.7%; RR = 1.93; *p* = 0.003) [32]. In our study, unintentional weight loss was the most powerful predictor of fall risk among the five frailty components. This finding suggests that the contribution of frailty components to fall risk may vary by race, age, and other physical conditions.

Unintentional weight loss is commonly associated with malignant diseases, psychiatric disorders, gastrointestinal conditions, endocrine disorders, and cardiovascular diseases [33]. Many older patients with unintentional weight loss also report experiencing concomitant malnutrition [34]. Numerous studies have shown that both unintentional and intentional weight

loss are unfavorably associated with increased mortality, morbidity, in-hospital complications, and reduced functional capacity for independent living [33, 35–37]. Rapid unintentional weight loss in older adults often indicates underlying diseases and accelerates age-related muscle loss. Weight loss can result from various physical, psychological, and social conditions, as well as age-related physiological changes. However, up to one-fourth of patients may have no identifiable cause [33].

Malnutrition is a key contributing factor to both weight loss and frailty in older adults. Studies examining the effects of malnutrition and falls among elderly inpatients have identified several risk factors [38–40]. Poor nutrition reliably predicts falls in hospitalized older patients, with malnourished individuals exhibiting higher fall rates [39]. In clinical practice, interventions such as nutritional screening and assessment should be implemented to prevent these avoidable falls. Poorly nourished participants had an elevated risk of self-reported falls over six months (RR = 1.5, 95% CI: 1.0–2.5,  $p = 0.03$ ) [40]. The relationship between malnutrition and body weight loss is inextricably linked [38]. Older adults experiencing body weight loss may have an increased risk of falls due to chronic malnutrition. Malnutrition is often a subtle underlying condition, whereas subsequent body weight loss is a visible clinical manifestation. Evaluating body weight loss is more accessible and intuitive for clinicians, enabling them to quickly identify patients at high risk of falling. However, clinicians often face challenges in diagnosing weight loss in older adults.

In most cases, a diagnosis can only be made after a thorough patient history, physical examination, and basic laboratory evaluation, followed by the prescription of nutritional supplements [41]. If the initial evaluation is unremarkable, malnutrition should be considered a contributing factor [33]. Malnutrition screening tools are effective in identifying older adults at risk, enabling early prevention. Additionally, several quantitative malnutrition screening tools have been developed and evaluated for their effectiveness [42, 43]. A review of 74 papers covering 119 validation studies on 34 malnutrition screening tools used in older adults across various settings was conducted. The validation results varied considerably across tools, studies, and settings [43]. Therefore, tools for assessing malnutrition should be carefully selected based on the age of the subjects, the target population, and the intended setting.

Identifying and addressing any underlying causes is the primary goal in managing weight loss [33]. Treatment for unintentional weight loss often requires improving access to adequate nutrition [33]. Therefore, several

essential non-pharmacological strategies can be implemented to prevent or manage malnutrition and promote adequate food intake. Additionally, other factors contributing to poor diet quality should be considered, including poverty, poor dental health, difficulties with chewing or swallowing, stress, and emotional distress [33].

### Limitation

Several limitations of this study should be acknowledged. First, the relatively small sample size may have led to inconclusive results, potentially affecting the validity of the findings. Second, the cross-sectional study design limits the ability to establish temporality between exposure and outcome. To clarify causal relationships, explanatory research designs are necessary, as the observed associations may be difficult to interpret. Third, potential biases in our research setting may include recording bias, responder bias, recall bias, social desirability bias, and interviewer bias. These biases are often difficult to avoid when evaluating fall history among older adults. Additionally, assessing psychological conditions related to weight loss, such as depression, could have provided more comprehensive insights. Therefore, future studies should adopt a longitudinal design to observe and analyze these variables over time. Implementing random sampling in participant recruitment would also improve the generalizability of the findings. This approach would better capture the relationship between weight changes and fall risk.

### CONCLUSIONS

Unintentional weight loss has been identified as the most influential frailty component in predicting fall risk among older adults in Taiwanese community settings. The five individual frailty phenotypes predict fall risk more effectively than overall frailty status. However, the relationship between frailty, its components, and fall risk is complex and warrants further investigation. Our findings highlight the need for future studies to prioritize longer follow-up cohort designs to confirm the causal relationship between specific frailty phenotypes and fall risk among community-dwelling older adults. A deeper understanding of these associations could inform more targeted and effective fall prevention strategies for this population.

### MATERIALS AND METHODS

#### Participants

This cross-sectional study was conducted in Keelung City, a metropolitan area in northern Taiwan. A total of



375 participants were enrolled in an Elderly Fall Prevention Program (Supplementary Table 1). The study used the Taiwan version of the Falls Risk for Older People in the Community (Tw-FROP-Com), established through a standardized translation procedure, to identify older adults at risk of falling. The inclusion criteria were as follows: older adults aged  $\geq 65$  years who met at least one of the following conditions: (1) experienced a fall within the past 12 months or (2) exhibited a fear of falling.

**Frailty phenotypes**

We modified the definition of frailty status based on the frailty syndrome proposed by the Cardiovascular Health Study (CHS) [16]. While traits such as “weakness,” “slowness,” and “exhaustion” remained unchanged, the definitions of “weight loss” and “low physical activity” were adapted to better suit the elderly population in Taiwan. The definitions and criteria for each frailty phenotype are detailed below:

- Weakness: Grip strength was measured as the mean of three measurements from the dominant hand. Participants with grip strength values below 26 kg for males and 18 kg for females met the criteria for weakness [44].
- Slowness: Slowness was defined as the time required to walk 5 meters. Participants with a walking speed of less than 0.8 m/sec were categorized as slow [44].
- Exhaustion: This was assessed using two self-reported statements: (1) “I felt that everything I did was an effort” and (2) “I could not get going” [45]. Participants rated how often they experienced these feelings in the previous week:

- 0: Rarely or none of the time (0–1 day)
- 1: Some or a little of the time (1–2 days)
- 2: A moderate amount of the time (3–4 days)
- 3: Most of the time

Participants scoring “2” or “3” on either statement were categorized as frail under the exhaustion criterion [16].

- Weight loss: Unintentional weight loss was defined as a loss of more than 3 kg or greater than 5% of body weight in the preceding year [46].
- Low physical activity: Energy expenditure was assessed using the International Physical Activity Questionnaire (IPAQ) Short Form, specifically the Taiwan IPAQ for older adults. Physical activity during the previous week was quantified. Males with weekly energy expenditure below 2375.6 kcal and females below 2432.4 kcal—representing the lowest

20% of participants—met the criterion for low physical activity [46].

Participants were classified as robust if they met none of the criteria, prefrail if they met 1–2 criteria, and frail if they met  $\geq 3$  criteria.

| Frailty component     | Definition                                                                                                                                                                  |
|-----------------------|-----------------------------------------------------------------------------------------------------------------------------------------------------------------------------|
| Weakness              | Males: Grip strength <26 kg<br>Females: Grip strength <18 kg                                                                                                                |
| Slowness              | Walking 5 meters at a speed of $\leq 0.8$ m/sec                                                                                                                             |
| Exhaustion            | Participants reporting feeling (1) “I felt that everything I did was an effort” or (2) “I could not get going” for more than 3 days in the previous week met the criterion. |
| Weight loss           | Unintentional weight loss >3 kg or greater than 5% of body weight in the preceding year                                                                                     |
| Low physical activity | Males: Energy expenditure <2375.6 Kcals per week<br>Females: Energy expenditure <2432.4 Kcals per week                                                                      |

**Fall risk assessment**

Fall risk was assessed using the community-based comprehensive fall risk assessment tool, the Taiwanese version of the Falls Risk for Older People in the Community (Tw-FROP-Com). The FROP-Com demonstrated excellent reliability and moderate ability to predict falls. In a study evaluating its reliability, validity, and accuracy, the intra-class correlation coefficients for intra-rater and inter-rater reliability of the FROP-Com were 0.93 and 0.81, respectively [47]. For the Tw-FROP-Com, these values were 0.99 and 0.97 [48].

The Tw-FROP-Com consists of 28 items covering 13 identified risk factors for falls. These risk factors are summarized in the table below:

| Tw-FROP-Com items  | Description                                                                                           | Scoring    |
|--------------------|-------------------------------------------------------------------------------------------------------|------------|
| History of falls   | History of falls and fall-related injuries                                                            | 0–3 points |
| Medications        | Use of sedatives, anticoagulants, or other medications that elevate fall risk                         | 0–3 points |
| Medical conditions | Conditions such as arthritis, Parkinson’s disease, stroke, cardiac conditions, diabetes, osteoporosis | 0–3 points |
| Sensory loss       | Vision and somatosensory impairments                                                                  | 0–1 points |
| Feet and           | Foot-related issues and                                                                               | 0–1        |

|                        |                                                                                              |            |
|------------------------|----------------------------------------------------------------------------------------------|------------|
| footwear               | inappropriate footwear                                                                       | points     |
| Cognitive status       | Cognitive impairment or decline                                                              | 0–3 points |
| Continence             | Issues with urinary or fecal continence                                                      | 0–1 points |
| Nutritional status     | Recent weight changes or malnutrition                                                        | 0–3 points |
| Environment            | Hazards such as poor lighting, steps, or uneven surfaces                                     | 0–3 points |
| Functional behaviour   | Fear of falling or risk-taking behaviors                                                     | 0–3 points |
| Function               | Difficulty performing activities of daily living                                             | 0–3 points |
| Balance                | Unsafe or irregular walking patterns that increase fall risk                                 | 0–3 points |
| Gait/Physical Activity | Low levels of physical activity, quantified as energy expenditure below specified thresholds | 0–3 points |

Each item was scored on a scale of 0–1 or 0–3, indicating the severity of individual risk factors and the overall fall risk. In our analysis, fall risk scores were categorized into two subgroups: mild fall risk (0–11) and moderate fall risk (12–60).

### Statistical analysis

Descriptive statistics for participant characteristics were summarized using IBM SPSS Statistics (Version 28) [49]. Means and standard deviations were calculated for continuous variables. For group comparisons, *t*-tests were applied for two groups, and one-way ANOVA for three or more groups. Multivariate linear regression was performed to examine the association between frailty phenotypes/status and the Tw-FROP-Com score. Additionally, multivariate logistic regression was used to evaluate the relationship between frailty phenotypes/status and the Tw-FROP-Com risk grading. A *p*-value of < 0.05 was considered statistically significant.

### AUTHOR CONTRIBUTIONS

Ya-Mei Tzeng (Conceptualization: Equal; Resources: Equal; Data curation: Lead; Validation: Lead; Formal analysis: Lead; Writing – original draft: Lead; Writing – review and editing: Equal); Senyeong Kao (Conceptualization: Supporting; Data curation: Equal; Formal analysis: Supporting; Funding acquisition: Lead; Resources: Equal; Validation: Equal; Writing – original draft: Equal; Writing – review and editing: Equal); Wen-Hsin Chen (Methodology: Equal; Formal analysis: Equal; Writing – original draft: Supporting); Shueh-Fen Chen (Methodology: Supporting; Resources: Equal; Writing – review and editing: Supporting); Shan-

Ru Li (Methodology: Supporting; Formal analysis: Supporting; Writing – original draft: Supporting); Yu-Lung Chiu (Methodology: Supporting; Formal analysis: Supporting; Writing – review and editing: Supporting); Yu-Tien Chang (Conceptualization: Equal; Data curation: Equal; Visualization: Lead; Writing – original draft: Equal; Writing – review and editing: Lead); Yaw-Wen Chang (Conceptualization: Lead; Data curation: Lead; Methodology: Equal; Formal analysis: Equal; Validation: Equal; Writing – original draft: Equal; Writing – review and editing: Equal).

### ACKNOWLEDGMENTS

We thank Chih-Yen Liu, Ming-Yu Jan, Ya-Chieh Hsieh, Huei-Cih You, Tzu-Ching Hung, Chien-Yu Chen, and Ying-Hsueh Chang for their assistance with data collection. This study was supported by grants from the Ministry of Science and Technology, Taiwan (MOST 106-2314-B-016-020), and the Ministry of National Defense—Medical Affairs Bureau (MAB-112-086). The funding sources had no role in the study design; data collection, analysis, and interpretation; manuscript preparation, review, or approval; or the decision to submit the manuscript for publication.

### CONFLICTS OF INTEREST

The authors declare no conflicts of interest related to this study.

### ETHICAL STATEMENT AND CONSENT

This study was approved by the Institutional Review Board of Tri-Service General Hospital, Taipei, Taiwan (Approval No.: TSGHIRB 2-105-05-147). Written informed consent was obtained from all participants. All procedures adhered to the ethical standards of the Institutional Review Board and the Declaration of Helsinki.

### FUNDING

This research was supported by the Ministry of National Defense—Medical Affairs Bureau (MAB-112-086), Taiwan, and the Ministry of Science and Technology, Taiwan (MOST 106-2314-B-016-020).

### REFERENCES

1. World Health Organization. World report on ageing and health. Geneva: World Health Organization. 2015.
2. Centers for Disease Control and Prevention. Deaths from older adult falls. Atlanta, GA: CDC. Available at:

<https://www.cdc.gov/falls/facts.html>. (Accessed June 14, 2023). 2023.

3. Williams SW, Williams CS, Zimmerman S, Munn J, Dobbs D, Sloane PD. Emotional and physical health of informal caregivers of residents at the end of life: the role of social support. *J Gerontol B Psychol Sci Soc Sci*. 2008; 63:S171–83.  
<https://doi.org/10.1093/geronb/63.3.s171>  
PMID:[18559692](https://pubmed.ncbi.nlm.nih.gov/18559692/)
4. Zhang Y, Zhang L, Zhang X, Sun J, Wang D, Chen G. Fall Injuries and Depressive Symptoms Among Older Adults and the Mediating Effects of Social Participation - China, 2011-2018. *China CDC Wkly*. 2021; 3:837–41.  
<https://doi.org/10.46234/ccdcw2021.207>  
PMID:[34659864](https://pubmed.ncbi.nlm.nih.gov/34659864/)
5. World Health Organization. Falls. Available at: <https://www.who.int/news-room/fact-sheets/detail/falls>. (Accessed June 14, 2023). 2021.
6. Cheng MH, Chang SF. Frailty as a Risk Factor for Falls Among Community Dwelling People: Evidence From a Meta-Analysis. *J Nurs Scholarsh*. 2017; 49:529–36.  
<https://doi.org/10.1111/jnu.12322>  
PMID:[28755453](https://pubmed.ncbi.nlm.nih.gov/28755453/)
7. Stevens JA, Lee R. The Potential to Reduce Falls and Avert Costs by Clinically Managing Fall Risk. *Am J Prev Med*. 2018; 55:290–7.  
<https://doi.org/10.1016/j.amepre.2018.04.035>  
PMID:[30122212](https://pubmed.ncbi.nlm.nih.gov/30122212/)
8. McKay MA, Todd-Magel C, Copel L. Factors associated with the risk for falls in PACE participants. *Geriatr Nurs*. 2020; 41:571–8.  
<https://doi.org/10.1016/j.gerinurse.2020.03.002>  
PMID:[32199737](https://pubmed.ncbi.nlm.nih.gov/32199737/)
9. Fang X, Shi J, Song X, Mitnitski A, Tang Z, Wang C, Yu P, Rockwood K. Frailty in relation to the risk of falls, fractures, and mortality in older Chinese adults: results from the Beijing Longitudinal Study of Aging. *J Nutr Health Aging*. 2012; 16:903–7.  
<https://doi.org/10.1007/s12603-012-0368-6>  
PMID:[23208030](https://pubmed.ncbi.nlm.nih.gov/23208030/)
10. Hwa Hsu C, Tung HH, Cliniciu DL, Chen LK, Yin WH, Iqbal U, Wang TJ. Physical activity: A primary health quality determinant among community-dwelling geriatric women in Taiwan. *Int J Qual Health Care*. 2017; 29:792–6.  
<https://doi.org/10.1093/intqhc/mzx101>  
PMID:[29024954](https://pubmed.ncbi.nlm.nih.gov/29024954/)
11. Tom SE, Adachi JD, Anderson FA Jr, Boonen S, Chapurlat RD, Compston JE, Cooper C, Gehlbach SH, Greenspan SL, Hooven FH, Nieves JW, Pfeilschifter J, Roux C, et al, and GLOW Investigators. Frailty and fracture, disability, and falls: a multiple country study from the global longitudinal study of osteoporosis in women. *J Am Geriatr Soc*. 2013; 61:327–34.  
<https://doi.org/10.1111/jgs.12146>  
PMID:[23351064](https://pubmed.ncbi.nlm.nih.gov/23351064/)
12. Ensrud KE, Ewing SK, Cawthon PM, Fink HA, Taylor BC, Cauley JA, Dam TT, Marshall LM, Orwoll ES, Cummings SR, and Osteoporotic Fractures in Men Research Group. A comparison of frailty indexes for the prediction of falls, disability, fractures, and mortality in older men. *J Am Geriatr Soc*. 2009; 57:492–8.  
<https://doi.org/10.1111/j.1532-5415.2009.02137.x>  
PMID:[19245414](https://pubmed.ncbi.nlm.nih.gov/19245414/)
13. Zaslavsky O, Zelber-Sagi S, Gray SL, LaCroix AZ, Brunner RL, Wallace RB, O'Sullivan MJ, Cochrane B, Woods NF. Comparison of Frailty Phenotypes for Prediction of Mortality, Incident Falls, and Hip Fracture in Older Women. *J Am Geriatr Soc*. 2016; 64:1858–62.  
<https://doi.org/10.1111/jgs.14233>  
PMID:[27310179](https://pubmed.ncbi.nlm.nih.gov/27310179/)
14. Kim H, Awata S, Watanabe Y, Kojima N, Osuka Y, Motokawa K, Sakuma N, Inagaki H, Eda Hiro A, Hosoi E, Won CW, Shinkai S. Cognitive frailty in community-dwelling older Japanese people: Prevalence and its association with falls. *Geriatr Gerontol Int*. 2019; 19:647–53.  
<https://doi.org/10.1111/ggi.13685>  
PMID:[31083795](https://pubmed.ncbi.nlm.nih.gov/31083795/)
15. Alves S, Teixeira L, Ribeiro O, Paúl C. Examining Frailty Phenotype Dimensions in the Oldest Old. *Front Psychol*. 2020; 11:434.  
<https://doi.org/10.3389/fpsyg.2020.00434>  
PMID:[32273861](https://pubmed.ncbi.nlm.nih.gov/32273861/)
16. Fried LP, Tangen CM, Walston J, Newman AB, Hirsch C, Gottdiener J, Seeman T, Tracy R, Kop WJ, Burke G, McBurnie MA, and Cardiovascular Health Study Collaborative Research Group. Frailty in older adults: evidence for a phenotype. *J Gerontol A Biol Sci Med Sci*. 2001; 56:M146–56.  
<https://doi.org/10.1093/gerona/56.3.m146>  
PMID:[11253156](https://pubmed.ncbi.nlm.nih.gov/11253156/)
17. Bieniek J, Wilczyński K, Szewieczek J. Fried frailty phenotype assessment components as applied to geriatric inpatients. *Clin Interv Aging*. 2016; 11:453–9.  
<https://doi.org/10.2147/CIA.S101369>  
PMID:[27217729](https://pubmed.ncbi.nlm.nih.gov/27217729/)
18. Palomo I, García F, Albala C, Wehinger S, Fuentes M, Alarcón M, Arauna D, Montecino H, Mendez D, Sepúlveda M, Fuica P, Fuentes E. Characterization by Gender of Frailty Syndrome in Elderly People according to Frail Trait Scale and Fried Frailty Phenotype. *J Pers Med*. 2022; 12:712.  
<https://doi.org/10.3390/jpm12050712>  
PMID:[35629135](https://pubmed.ncbi.nlm.nih.gov/35629135/)

19. Xue QL. The frailty syndrome: definition and natural history. *Clin Geriatr Med*. 2011; 27:1–15.  
<https://doi.org/10.1016/j.cger.2010.08.009>  
PMID:21093718
20. Chittrakul J, Siviroy P, Sungkarat S, Sapbamrer R. Physical Frailty and Fall Risk in Community-Dwelling Older Adults: A Cross-Sectional Study. *J Aging Res*. 2020; 2020:3964973.  
<https://doi.org/10.1155/2020/3964973>  
PMID:32714612
21. Moreira NB, Bento PCB, Vieira E, da Silva JLP, Rodacki ALF. Comparison of the Clinical-Functional Vulnerability Index and the frailty phenotype for the identification of falls in older individuals: A cross-sectional study. *Ann Phys Rehabil Med*. 2023; 66:101675.  
<https://doi.org/10.1016/j.rehab.2022.101675>  
PMID:35577313
22. Op het Veld LP, van Rossum E, Kempen GI, de Vet HC, Hajema K, Beurskens AJ. Fried phenotype of frailty: cross-sectional comparison of three frailty stages on various health domains. *BMC Geriatr*. 2015; 15:77.  
<https://doi.org/10.1186/s12877-015-0078-0>  
PMID:26155837
23. Papachristou E, Wannamethee SG, Lennon LT, Papacosta O, Whincup PH, Iliffe S, Ramsay SE. Ability of Self-Reported Frailty Components to Predict Incident Disability, Falls, and All-Cause Mortality: Results From a Population-Based Study of Older British Men. *J Am Med Dir Assoc*. 2017; 18:152–7.  
<https://doi.org/10.1016/j.jamda.2016.08.020>  
PMID:27742583
24. Adebero T, Bobos P, Somerville L, Howard J, Vasarhelyi EM, Lanting B, Hunter SW. Implementation of falls risk evaluation at one-year after total hip arthroplasty: a cross-sectional study. *Arch Physiother*. 2022; 12:16.  
<https://doi.org/10.1186/s40945-022-00141-6>  
PMID:35836298
25. Meyer C, Chapman A, Klattenhoff Reyes K, Joe A. Profiling the risk factors associated with falls in older people with diabetes receiving at-home nursing care: Retrospective analysis of an Australian aged care provider database. *Health Soc Care Community*. 2022; 30:762–75.  
<https://doi.org/10.1111/hsc.13194>  
PMID:33084170
26. Ng MM, Hill KD, Batchelor F, Burton E. Factors Predicting Falls and Mobility Outcomes in Patients With Stroke Returning Home After Rehabilitation Who Are at Risk of Falling. *Arch Phys Med Rehabil*. 2017; 98:2433–41.  
<https://doi.org/10.1016/j.apmr.2017.05.018>  
PMID:28647551
27. Zhang L, Zeng Y, Weng C, Yan J, Fang Y. Epidemiological characteristics and factors influencing falls among elderly adults in long-term care facilities in Xiamen, China. *Medicine (Baltimore)*. 2019; 98:e14375.  
<https://doi.org/10.1097/MD.00000000000014375>  
PMID:30813138
28. Lin YR, Chiu BR, Tzeng YM, Kao S, Chang YH, Chang YW. Risk factors of falling among community dwelling elders in Taipei City - a cross-sectional study using Taiwan version of falls risk for older people community setting (Tw-FROP-Com). *Chinese J Occup Med*. 2017; 24:93–102.
29. Kojima G. Frailty as a Predictor of Future Falls Among Community-Dwelling Older People: A Systematic Review and Meta-Analysis. *J Am Med Dir Assoc*. 2015; 16:1027–33.  
<https://doi.org/10.1016/j.jamda.2015.06.018>  
PMID:26255098
30. Lan X, Li H, Wang Z, Chen Y. Frailty as a predictor of future falls in hospitalized patients: A systematic review and meta-analysis. *Geriatr Nurs*. 2020; 41:69–74.  
<https://doi.org/10.1016/j.gerinurse.2019.01.004>  
PMID:30765177
31. Thakkar S, T M, Srivastava S. Cross-sectional associations of physical frailty with fall, multiple falls and fall-injury among older Indian adults: Findings from LASI, 2018. *PLoS One*. 2022; 17:e0272669.  
<https://doi.org/10.1371/journal.pone.0272669>  
PMID:35960705
32. Duarte GP, Santos JLF, Lebrão ML, Duarte YAO. Relationship of falls among the elderly and frailty components. *Rev Bras Epidemiol*. 2019 (Suppl 02); 21:e180017.  
<https://doi.org/10.1590/1980-549720180017.supl.2>  
PMID:30726362
33. Alibhai SM, Greenwood C, Payette H. An approach to the management of unintentional weight loss in elderly people. *CMAJ*. 2005; 172:773–80.  
<https://doi.org/10.1503/cmaj.1031527>  
PMID:15767612
34. Hardy C, Wallace C, Khansur T, Vance RB, Thigpen JT, Balducci L. Nutrition, cancer, and aging: an annotated review. II. Cancer cachexia and aging. *J Am Geriatr Soc*. 1986; 34:219–28.  
<https://doi.org/10.1111/j.1532-5415.1986.tb04207.x>  
PMID:3081618
35. Miller SL, Wolfe RR. The danger of weight loss in the elderly. *J Nutr Health Aging*. 2008; 12:487–91.  
<https://doi.org/10.1007/BF02982710>  
PMID:18615231
36. Nguyen ND, Center JR, Eisman JA, Nguyen TV. Bone loss, weight loss, and weight fluctuation predict



- mortality risk in elderly men and women. *J Bone Miner Res.* 2007; 22:1147–54.  
<https://doi.org/10.1359/jbmr.070412>  
 PMID:17635040
37. Sullivan DH, Patch GA, Walls RC, Lipschitz DA. Impact of nutrition status on morbidity and mortality in a select population of geriatric rehabilitation patients. *Am J Clin Nutr.* 1990; 51:749–58.  
<https://doi.org/10.1093/ajcn/51.5.749>  
 PMID:2110413
  38. Eglseer D, Hoedl M, Schoberer D. Malnutrition risk and hospital-acquired falls in older adults: A cross-sectional, multicenter study. *Geriatr Gerontol Int.* 2020; 20:348–53.  
<https://doi.org/10.1111/ggi.13885>  
 PMID:32036627
  39. Lackoff AS, Hickling D, Collins PF, Stevenson KJ, Nowicki TA, Bell JJ. The association of malnutrition with falls and harm from falls in hospital inpatients: Findings from a 5-year observational study. *J Clin Nurs.* 2020; 29:429–36.  
<https://doi.org/10.1111/jocn.15098>  
 PMID:31715045
  40. Vivanti AP, McDonald CK, Palmer MA, Sinnott M. Malnutrition associated with increased risk of frail mechanical falls among older people presenting to an emergency department. *Emerg Med Australas.* 2009; 21:386–94.  
<https://doi.org/10.1111/j.1742-6723.2009.01223.x>  
 PMID:19840088
  41. Gazewood JD, Mehr DR. Diagnosis and management of weight loss in the elderly. *J Fam Pract.* 1998; 47:19–25.  
 PMID:9673603
  42. Poulia KA, Yannakoulia M, Karageorgou D, Gamaletsou M, Panagiotakos DB, Sipsas NV, Zampelas A. Evaluation of the efficacy of six nutritional screening tools to predict malnutrition in the elderly. *Clin Nutr.* 2012; 31:378–85.  
<https://doi.org/10.1016/j.clnu.2011.11.017>  
 PMID:22182948
  43. Power L, Mullally D, Gibney ER, Clarke M, Visser M, Volkert D, Bardon L, de van der Schueren MAE, Corish CA, and MaNuEL Consortium. A review of the validity of malnutrition screening tools used in older adults in community and healthcare settings - A MaNuEL study. *Clin Nutr ESPEN.* 2018; 24:1–13.  
<https://doi.org/10.1016/j.clnesp.2018.02.005>  
 PMID:29576345
  44. Chen LK, Liu LK, Woo J, Assantachai P, Auyeung TW, Bahyah KS, Chou MY, Chen LY, Hsu PS, Kairit O, Lee JS, Lee WJ, Lee Y, et al. Sarcopenia in Asia: consensus report of the Asian Working Group for Sarcopenia. *J Am Med Dir Assoc.* 2014; 15:95–101.  
<https://doi.org/10.1016/j.jamda.2013.11.025>  
 PMID:24461239
  45. Orme JG, Reis J, Herz EJ. Factorial and discriminant validity of the Center for Epidemiological Studies Depression (CES-D) scale. *J Clin Psychol.* 1986; 42:28–33.  
[https://doi.org/10.1002/1097-4679\(198601\)42:1<28::aid-jclp2270420104>3.0.co;2-t](https://doi.org/10.1002/1097-4679(198601)42:1<28::aid-jclp2270420104>3.0.co;2-t)  
 PMID:3950011
  46. Chen LJ, Chen CY, Lue BH, Tseng MY, Wu SC. Prevalence and associated factors of frailty among elderly people in Taiwan. *International Journal of Gerontology.* 2014; 8:114–9.  
<https://doi.org/10.1016/j.ijge.2013.12.002>
  47. Russell MA, Hill KD, Blackberry I, Day LM, Dharmage SC. The reliability and predictive accuracy of the falls risk for older people in the community assessment (FROP-Com) tool. *Age Ageing.* 2008; 37:634–9.  
<https://doi.org/10.1093/ageing/afn129>  
 PMID:18565980
  48. Hong WL. Reliability and Validity of the Taiwan version of the Falls Risk for Older People in the Community (Tw-FROP-Com) (Unpublished master's thesis). National Defense Medical Center, Institute of Public Health. 2014.  
<https://hdl.handle.net/11296/4ey9r4>.
  49. IBM Corp. IBM SPSS Statistics for Windows, Version 28.0 (Computer software). Armonk, NY: IBM Corp. 2021.



## SUPPLEMENTARY MATERIALS

### Supplementary Table

**Supplementary Table 1. STROBE Statement—checklist of items that should be included in reports of cross-sectional studies.**

|                          | Item No | Recommendation                                                                                                                                                                                                 | Page No |
|--------------------------|---------|----------------------------------------------------------------------------------------------------------------------------------------------------------------------------------------------------------------|---------|
| Title and abstract       | 1       | (a) Indicate the study’s design with a commonly used term in the title or the abstract                                                                                                                         | 1       |
|                          |         | (b) Provide in the abstract an informative and balanced summary of what was done and what was found                                                                                                            | 1       |
| Introduction             |         |                                                                                                                                                                                                                |         |
| Background/rationale     | 2       | Explain the scientific background and rationale for the investigation being reported                                                                                                                           | 2       |
| Objectives               | 3       | State specific objectives, including any prespecified hypotheses                                                                                                                                               | 2       |
| Methods                  |         |                                                                                                                                                                                                                |         |
| Study design             | 4       | Present key elements of study design early in the paper                                                                                                                                                        | 9       |
| Setting                  | 5       | Describe the setting, locations, and relevant dates, including periods of recruitment, exposure, follow-up, and data collection                                                                                | 9       |
| Participants             | 6       | (a) Give the eligibility criteria, and the sources and methods of selection of participants                                                                                                                    | 9       |
| Variables                | 7       | Clearly define all outcomes, exposures, predictors, potential confounders, and effect modifiers. Give diagnostic criteria, if applicable                                                                       | 10      |
| Data sources/measurement | 8*      | For each variable of interest, give sources of data and details of methods of assessment (measurement). Describe comparability of assessment methods if there is more than one group                           | 10      |
| Bias                     | 9       | Describe any efforts to address potential sources of bias                                                                                                                                                      | 8–9     |
| Study size               | 10      | Explain how the study size was arrived at                                                                                                                                                                      | 9       |
| Quantitative variables   | 11      | Explain how quantitative variables were handled in the analyses. If applicable, describe which groupings were chosen and why                                                                                   | 10      |
|                          |         | (a) Describe all statistical methods, including those used to control for confounding                                                                                                                          | 11      |
|                          |         | (b) Describe any methods used to examine subgroups and interactions                                                                                                                                            |         |
| Statistical methods      | 12      | (c) Explain how missing data were addressed                                                                                                                                                                    |         |
|                          |         | (d) If applicable, describe analytical methods taking account of sampling strategy                                                                                                                             |         |
|                          |         | (e) Describe any sensitivity analyses                                                                                                                                                                          |         |
| Results                  |         |                                                                                                                                                                                                                |         |
| Participants             | 13*     | (a) Report numbers of individuals at each stage of study— e.g., numbers potentially eligible, examined for eligibility, confirmed eligible, included in the study, completing follow-up, and analysed          |         |
|                          |         | (b) Give reasons for non-participation at each stage                                                                                                                                                           |         |
|                          |         | (c) Consider use of a flow diagram                                                                                                                                                                             |         |
| Descriptive data         | 14*     | (a) Give characteristics of study participants (e.g., demographic, clinical, social) and information on exposures and potential confounders                                                                    | 4–5     |
|                          |         | (b) Indicate number of participants with missing data for each variable of interest                                                                                                                            |         |
| Outcome data             | 15*     | Report numbers of outcome events or summary measures                                                                                                                                                           |         |
|                          |         | (a) Give unadjusted estimates and, if applicable, confounder-adjusted estimates and their precision (e.g., 95% confidence interval). Make clear which confounders were adjusted for and why they were included | 4–6     |
| Main results             | 16      | (b) Report category boundaries when continuous variables were categorized                                                                                                                                      | 5–6     |
|                          |         | (c) If relevant, consider translating estimates of relative risk into absolute risk for a meaningful time period                                                                                               |         |

|                          |    |                                                                                                                                                                            |     |
|--------------------------|----|----------------------------------------------------------------------------------------------------------------------------------------------------------------------------|-----|
| Other analyses           | 17 | Report other analyses done—e.g., analyses of subgroups and interactions, and sensitivity analyses                                                                          |     |
| <b>Discussion</b>        |    |                                                                                                                                                                            |     |
| Key results              | 18 | Summarise key results with reference to study objectives                                                                                                                   | 6–8 |
| Limitations              | 19 | Discuss limitations of the study, taking into account sources of potential bias or imprecision. Discuss both direction and magnitude of any potential bias                 | 9   |
| Interpretation           | 20 | Give a cautious overall interpretation of results considering objectives, limitations, multiplicity of analyses, results from similar studies, and other relevant evidence | 6–8 |
| Generalisability         | 21 | Discuss the generalisability (external validity) of the study results                                                                                                      | 9   |
| <b>Other information</b> |    |                                                                                                                                                                            |     |
| Funding                  | 22 | Give the source of funding and the role of the funders for the present study and, if applicable, for the original study on which the present article is based              | 12  |

\*Give information separately for exposed and unexposed groups. An Explanation and Elaboration article discusses each checklist item and gives methodological background and published examples of transparent reporting. The STROBE checklist is best used in conjunction with this article (freely available on the Web sites of PLoS Medicine at <http://www.plosmedicine.org/>, Annals of Internal Medicine at <http://www.annals.org/>, and Epidemiology at <http://www.epidem.com/>). Information on the STROBE Initiative is available at <http://www.strobe-statement.org/>.
